# Supplementary material for: Maternal Germline-Specific Genes in the Asian Malaria Mosquito Anopheles stephensi: Characterization and Application for Disease Control
Source: PubMed Central journal article supplement (PMC4321024; doi:10.1534/g3.114.015578), 2014-12-05
Supplement: supp_g3.114.015578_FileS4.pdf [file supp_g3.114.015578_FileS4.pdf]

File S4

Plasmid sequences for transgenic constructs

Nos/anti-myd88

CCTGTCGTGCCAGCTGCATTAATGAATCGGCCAACGCGCGGGGAGAGGCGGTTTGCCTATTGGGCGCTCTCCGCTTCTCGCTC  
ACTGACTCGCTGCGCTCGGTCGTTCCGGCTGCGGCGAGCGGTATCAGCTCACTCAAAGGCGGTAATACGGTTATCCACAGAATCAG  
GGGATAACGCACGAAAGAACATGTGAGCAAAAAGGCCAGCAAAAAGGCCAGGAACCGTAAAAAGGCCGCGTTGCTGGCGTTTTCC  
ATAGGCTCCGCCCTGACGAGCATCACAAAATCGACGCTCAAGTCAGAGGTGGCGAAAACCCGACAGGACTATAAAGATACCA  
GGCGTTTTCCCTGGAAGCTCCCTCGTGCCTCTCCTGTTCCGACCCTGCCGCTTACCGGATACCTGTCCGCTTTCTCCCTTCCGG  
AAGCGTGGCGCTTTCTCATAGCTCACGCTGTAGGTATCTCAGTTCGGTGTAGGTCGTTCCGCTCAAGCTGGGCTGTGTGCACGAAC  
CCCCGTTACGCCGACCGCTGCGCCTTATCCGGTAACTATCGTCTTGTAGTCCAACCCGGTAAGACACGACTTATCGCCACTGGCA  
GCAGCCACTGGTAACAGGATTAGCAGAGCGAGGTATGTAGGCGGTGCTACAGAGTTCTTGAAGTGGTGGCCTAACTACGGCTAC  
ACTAGAAGAACAGTATTTGGTATCTGCGCTCTGCTGAAGCCAGTTACCTTCGGAAAAAGAGTTGGTAGCTCTTATCGGGCAAAC  
AAACCACCGCTGGTAGCGGTGGTTTTTTGTTTGAAGCAGCAGATTACGCGCAGAAAAAAGGATCTCAAGAAGATCCTTTGAT  
CTTTTCTACGGGTCTGACGCTCAGTGGAAACGAAAACCTACGTTAAGGGATTTTGGTATGAGATTATCAAAAAGGATCTTACCT  
AGATCCTTTTAAATAAAAATGAAGTTTTAAATCAATCTAAAGTATATATGAGTAAACTTGGTCTGACAGTTACCAATGCTTAATCA  
GTGAGGCACCTATCTCAGCGATCTGTCTATTTGTTTCCATAGTTGCTGACTCCCCGTCGTGTAGATAACTACGATACGGGAG  
GGCTTACCATCTGGCCCCAGTGTGCAATGATACCGCGAGACCCACGCTCACCAGCTCCAGATTTATCAGCAATAAACACAGCCAGC  
CGGAAGGCGCGAGCAGAAAGTGGTCTGCACTTTTCCGCTCCACTCCAGTCTATTAATTGTTGCCGGAAGCTAGAGTAAGT  
AGTTCCGCAAGTAAAGTTTTGCGCAACGTTGTTGCCATTGCTACAGGCATCGTGGTGTACGCTCGTGGTGTATGGTTCATTTC  
AGCTCCGGTCCCAACGATCAAGGCGAGTTACATGATCCCCATGTTGTGCAAAAAAGCGGGTTAGCTCCTTCCGGTCTCCGATCG  
TTGTCAGAAGTAAGTTGGCCGAGTGTATCACTCATGTTTATGGCAGCACTGCATAATTCTTACTGTATGCCATCCGTAAGAT  
GCTTTTCTGTGACTGGTGTACTCAACCAAGTCAATCTGAGAATAGTGTATGCGGCGACCGAGTTGCTTGGCCGGCGTCAATA  
CGGGATAATACCGGCCACATAGCAGAACCTTAAAGTGTCTCATTTGAAAAACGTTCTTCCGGGCGAAAACTCTCAAGGATCT  
TACCGCTGTTGAGATCCAGTTCGATGTAACCCACTCGTGCACCAACTGATCTTACGATCTTTTACTTTACCAGCGTTTCTGGGT  
GAGCAAAAACAGGAAGGCAAAATGCCGCAAAAAGGGAATAAGGGCGACACGAAATGTTGAATACTACTCTTCTTTTTTCA  
ATATTATTGAAGCATTTATCAGGGTATTGTCTCATGAGCGGATACATATTTGAATGATTTAGAAAAATAAACAATAGGGGTTCC  
CGCGCACATTTCCCGAAAAGTGCCACCTGACGTCTAAGAAACCTATTATCATGACATTAACCTATAAAAAATAGGCGTATCACG  
AGGCCCTTTCGTCCTCGCGCTTTCCGGTGTGACGGTGAACCTCTGACACATGCAGCTCCCGGAGACGGTACAGCTTGTCTGTA  
AGCGGATGCCGGGAGCAGACAAGCCCGTCAGGGCGGTGAGCGGGTGTGGCGGGTGTGGGGTGGCTTAACTATGCGGCAT  
CAGAGCAGATTGTACTGAGAGTGCACCATATGCGGTGTGAATACCGCAGACATGCGTAAGGAGAAAAATACCGCATCAGGCGCC  
ATTCGCCATTAGGCTGCGCAACTGTTGGGAAGGGGATCGGTGCGGGCTCTTCTGCTATTACGCCAGCTGGCGAAAGGGGAT  
GTGCTGCAAGGCGATTAAGTTGGGTAACGCCAGGTTTTCCAGTACGACGTTGTAACGACGCGCCAGTGCCAAGCTTTGTTT  
AAAAATATAACAAATTTGTGATCCCAAAAATGAAGTGGGGCAAAATCAATAATTAATAGTGTCCGTAACCTTGTGGTCTTCAA  
CTTTTTGAGGAACAGTGGACGGCAATCCGTGACTATAACACAAGTTGATTAATAATTTAGCCAACACGTCGGGCTGCGTGT  
TTTTTCCGACGCGTCTGTGTACAGTGTGATTAAGTGTGATTAACCTGTTGAAATAATTAATTTTGGTCTTCTTAAATCTGT  
GATGAAATTTTTAAAATAACTTTAAATTTCTTATTGGTAAAAAATGCCACGTTTTGCAACTGTGAGGGTCTAATATGAGGTCAA  
CTCAGTAGGAGTTTTATCCAAAAAGAAAAATGATTACGCTGTGTACACGAACGCGTATTAACGAGAGTGCAAAAGTATAAGAGG  
GTTAAAAATATATTTTACGCACCATATACGCATCGGGTGTATCGTTAATATGGATCAATTTGAACAGTTGATTAACGTGTCTCT  
GCTCAAGTCTTTGATCAAAACGCAATCGACGAAAATGTGTGCGACAATATCAAGTCGATGAGCGAAAAACTAAAAAGGCTAGAA  
TACGACAATCTCACAGACAGCGTTGAGATATACGGTATTCACGACAGCAGGCTGAATAAAAAAATTAGAACTATTATTTAAC  
CCTAGAAAAGATAATCATATTGTGACGTACGTTAAAGATAATCAGCTAAAATGACGCATGTGTTTTATCGGTCGTATATCGAG  
GTTTTATTTAATTTGAATAGATATTAAGTTTTATTATTACACTTACATACTAATAATAAATTAACAAACAATTTATTTATGTT  
TATTTATTTATTAATAAAAAAACAATACTAAAAATTTCTCTATTAAGTAACAATACTTTTAAACATTTCTCTTTTACAAAAATAA  
CTTATTTGTACTTTAAAAACAGTCATGTTGTATTATAAAAAAGTAATTAGCTTAACTTATACATAATAGAAAACAATTTACTTAT  
TAGTCAGTCAGAAACAATTTGGCACATATCAATATTATGCTCTGACAAAATACTTTTTTGCATTTTTTGCACGATGCATTTGCCTT  
TCGCCTATTTTAGAGGGGAGTAAGTACAGTAAGTACGTTTTTCTTACTGGCTCTTCACTGTCATCTGTATGACAGGCAC  
TTCATTTGGCAAAATATTAGAGATATTATCGCGCAAAATCTCTTCAAAGTAGGAGCTTCTAAACGCTTACGCATAAACGATGACG  
TCAGGCTCATGTAAGGTTTTCTATAAATTTTTGCGACTTTGAACCTTTTCTCCCTTGTACTGACATTAAGGCTGTATATAATAA  
AGAATTTATGCAGGCAATGTTTATCATTCCGTACAATAATGCCATAGGCCACCTATTCGTTCTTACTGCAAGGTCATCAGAAACA  
CATTTGGTCTAGCGTGTCCACTCCGCTTTAGTTTGATTATAATACATAACCATTTGCGGTTTACCGTACTTTCTGTTGATAGAAGC  
ATCTCATCACAAGATGATAATAAGTATACCATTTAGCTGGCTTCCGTTTATATGAGACGAGAGTAAGGGGTCGTCAAAACAAA  
ACATCGATGTTCCACTGGCTGGAGCGACTGTTTTTCACTTCCGGTATCTCGCGTTTTGTTGATCGCAGCGTTCCACAATGG  
TTAATTCGAGCTCCCGGGGATCTAATTCATTAAGAGCTAATTCAATTAGAGCTAATCAATTAAGTCAAGCTTATCGATTTCC  
GAACCTCAGACCGCCGAGTATAAATAGAGGCGCTTCTGCTACGAGCGACAATCAATTAACAAGCAAAAGTGAACACGTCGC  
TAAGCGAAAGCTAAGCAATAAACAAGCGCAGCTGAACAAGCTAAACAATCGGGGTACCGCTAGAGTTCGACGTTACCGCGGGCC  
CGGGATCCACCGGTGCCACCATGGTGCCTCCTCAAGAACGTCATCAAGGAGTTCATGCGCTTCAAGGTGCGCATGGAGGGCA

CCGTGAACGGCCACGAGTTCGAGATCGAGGGCGAGGGCGAGGGCCGCCCTACGAGGGCCACAACACCGTGAAGCTGAAGGTG  
ACCAAGGGCGGCCCTGCCCTTCGCCTGGGACATCTGTCCCCAGTTCCAGTACGGCTCCAAGGTGTACGTGAAGCACCCCGC  
CGACATCCCCGACTACAAGAAGCTGTCTTCCCCGAGGGCTTCAAGTGGGAGCGGTGATGAACCTCGAGGACGGCGCGTGGT  
GACCGTGACCCAGGACTCCTCCTGCAGGACGGCTGCTTCATCTACAAGGTGAAGTTCATCGGCGTGAACCTCCCCCTCCGACGGCC  
CCGTAATGCAGAAGAAGACCATGGGCTGGGAGGCTCCACCGAGCGCTGTACCCCGCGACGGCGTGTGAAGGGCGAGATCC  
ACAAGGCCCTGAAGCTGAAGGACGGCGGCCACTACCTGGTGGAGTTCAGTCCATCTACATGGCCAAGAAGCCCGTGCAGCTGC  
CCGGCTACTACTCGTGGACTCCAAGCTGGACATCACCTCCACAACGAGGACTACACCATCGTGGAGCAGTACGAGCGCACCGA  
GGCCCGCCACCACCTGTTCTGTAGCGGGCGGACTAGATCATAATCAGCCATACCACATTTGTAGAGGTTTTACTTGTCTTTAAA  
AAACCTCCCACACCTCCCCCTGAACCTGAAACATAAAAATGAATGCAATTGTTGTTAACTTGTATTGCAGCTTATAATGGTTA  
CAAATAAAGCAATAGCATCACAATTTCAAAAATAAAGCATTTTTTCTACTGCATTCTAGTTGTGGTTTGTCCAAACTCATCAATGT  
ATCTTAAAGCTTATCGAATACGCGTACGGCGCGCTCGGTAAGGTGCAATTGTGGTGCATTGCGCAAAACATAAATCATAGTCA  
ACGTTGGCACAGCACCATCGCCGCCACCGGCTACTACGGTGTGTACCACGGTGACACATCCTCCAGTGCAGATTGGATGGGATT  
GCTCTATGTATTAGCTGGGGATAGATTTGATGCAGCGACGGTCATGGCAATGATCAGCACTAATTATGAGGGTATTCTTCTGTCT  
GTCGTCTTACTGTACAACCTCACACAATCAATGCACATTCTGTTGCAGACAAGACATGCGACACAACAAGAAGTGCAGAT  
TAAAAAAAAGCTCCACCGTATGGGTTATTCCAGTTCACAAATTCGAGTGATACAACCTTAAGGGCTGTGAAATATCGCACCTTAC  
AATAGTAACCCCTGGCCGTGCTTACTGTTTGCACCTTTTTCTCCACAGATGCTAATATCCAAAATGTTGAAGTGCTTAATTTTATT  
CTAATTTTGTACGCAAAAACGAGCTACGGACTGTCAATTGAATGCGTACATATTTGACAGTGCAGACGGCGGTAATGATGATGA  
TGCTGTGCAATCAACTACCCGATGTTATGATGATTCACTGCTTGTCCACCGTGAAGCCACGACCAGCCGCAAAGCTGCGCGATG  
CATCAAACATGGAATTCGCTAGCCACAACAAAAACCAACTATATGCACACTGCTGCCGTATACCCACATCGCGCACGTAAAGTA  
AACATACACGCACACAAAAGCCATACCTCGGTCACTGTCACACGGCTCACACACAGCCGAAGATGTTCCGCAACAGTATAGTA  
ATTTGTTTTATTTAATTTACACTACAATGAAATGGGGATTTTTATCACTCCAGCAGCAGCGATTCAATCGTTAGCCGACCC  
ACCGGAACAGGGCCAGAGTCCATAACATAATAGTTTACAGGGTACAATTTCCCGGCACACACTTTCCAGCACCAGCACTCAC  
CACCCGCAATACCACAATACTGTGTTCAAACACCAATACCAATACTCGAACCATCCAATTTTACCTTTCCAATCAGCTTCTGTTGC  
GTGAAAGAACGTGCGACGAAACAAAGGACCGACACGGTAGTAAGTCTACAATAAACAAACAACAGCAAAGTGTAAAGATCCC  
ACTGATTGGAATGAACAAAACGAGAGCGTACGCACCCACGGCCGTGGTCAACCTTACTTTATAAAATCTACGGAAAAACTTGC  
ACGACGTGCGCTTCTGCTTCTTTATGCGCTGGCTGTGTGTGTGTGTTTTTTTTCTGCTCGGAAGACAATGGAAAACATCATCG  
CTGAACGAAAACGTCAAAACCGTGCCTTCCATCACTTAACGAAAACAATGTCAACCGTGCAGAAATCGCACGTTTTTAAAGAAA  
CCTTTTACGGTGGAAAAACGGGAAAGAAAATTTCCGAATGGAAAGAAATGGTTTTCGCGATCTTCTTGAATAGTGGGGCTGGAA  
GTTGCATTTTCTATGATTCACAAACCTTTTTTATTGTCATGCTTGTAGTGGTGTGTTGTTGTTGCGGCGGAAATGGTTGAGATGGACT  
TCAATTGCAAGCTGGTAGTGGTAATTTGTTTATGTCGCGAGCGCAATGGAGTGTGTTTACTTGTAGCAGTGTACTAAGGTCCTTGTCT  
GGTACCATCTCAAATACCACGCATACATACGCGCAACTGTTTATGCGACCGTGCACGCGTTTGTGAGTCTTTTATACCCAAAAT  
GTCCATCGTGGTGGTGGTGGCAAGTGGCGTAAGCTCGCGGATCGACTCACTGTAACGCCGTTGCTGACTTCTGTTGTTGA  
TCTGCAATTAAGCATCTTTGAATTAAGTTTTGTGTTGCTTTGAGCGTGAAATTAATAACCTGGCCAGTTTTGCAACATCCTTGATAG  
GCCCCACAACATCCTTTATGTGAAGAAGTCCCTTTTCCACTAGTCTAGGTTAGAAGTGCACCGAAATCGGACCGAGCTTTGA  
CCGTTTTGATCGTCCATTGTTTGTGATACAGGATTGAATATCTACTCTGCGAGCTTTAAAGGTAAGAAGATCGTTTCCGATTAGGCGC  
TAATTGGGATTTGTTGGAGCAAGAGTGTGATCTGAAGTGCACCGTATGCTGGATGGAAGTATTTGATCGCCATGTCTAAGG  
AGTCAATATGAACAATGAAGGACCACCAATATCAACTGATACATTTTATTGTAATAATTGTATCATTGTTATTGGTGGTGTCTTGGG  
GTTCATAATTTTACTGAGTCTTTGTGCTTATTGGATTACGCAAGAATGGCGATTGCGGCACAACCTGCGCATCTCCAACACGATAT  
GGAATACGGTTTTGTTGGTGGTGTGCTGTAGTGCCCAATTAACATTTGTAACCTACAGTAACCTGAAACAAGTGATACCTATTGTTA  
TAATACGTGCAGCTAAGAAGTAAAAAATGCCAGTTTTGTTCAACAACGATACAACGTAATCGACATTTTGTAAATATGTGATAT  
GAATATTAAGTGATTTTCAAGTATGTAATTAATTTGTGATCCAAATACGAGCATTATGAGTGGTTTTCTATATGTTACAATGGAT  
TAAGTTGTACCACTACGTGCACGGTGTATGTGATACATGATTTTTTGAACATAACTGTATCACACAGCGCAATTGCACGTTGTTG  
GCAATATAGTATCAGATGGAAGACGCCAAAAACATAAAGAAGGCCCGCCATTCTATCCGCTGGAAGATGGAACCGCTGGAGA  
GCAACTGCATAAAGGCTATGAAGAGATACGCCCTGGTTCTGGAACAATTTGCTTTTACAGATGCACATATCGAGGTGGACATCACTT  
ACGCTGAGTACTTCGAAATGTCGGTTCGGTGGCAGAAGCTATGAAACGATATGGGCTGAATACAAATCACAGAATCGTCGTATG  
CAGTGAAAACTCTTCAATTTTATGCGGGTGTGGGCGGCTTATTTATCGGAGTTGCAGTTGCGCCCGCAACGACATTTATA  
ATGAACGTGAATTGCTCAACAGTATGGGCATTTGCGAGCCTACCGTGGTGTGTTTCCAAAAAGGGGTTGCAAAAAATTTTGAAC  
GTGCAAAAAAAGCTCCAATCATCAAAAAATTTATCATGGATTCTAAAACGGATTACCAGGGATTTTCACTGATGTACAGTT  
CGTCACATCTCATCTACCTCCCGTTTTAATGAATACGATTTTGTGCCAGAGTCTTTCGATAGGACAAGACAATTGCACTGATCAT  
GAACCTCTGGATCTACTGGTCTGCCTAAAGGTGTGCTCTGCTCATAGAAGTGCCTGCGTGAGATTCTCGCATGCCAGAGATC  
CTATTTTGGCAATCAAATCATTCCGGTACTGCGATTTTAAAGTGTGTTCCATTCATCACGGTTTTTGAAGTGTACTACTCGG  
ATATTTGATATGTGGATTTGAGTCTTAATGTATAGATTTGAAGAAGAGCTGTTTCTGAGGAGCCTTCAAGATTACAAGATTC  
AAAGTGCCTGCTGGTGGCAACCTATTTCTCTTCTTCCGCAAAAGCACTCTGATTGACAATAACGATTTTACTAATTTACAGAAA  
TTGCTTCTGAGCTCCCTCTAAGGAAGTCCGGGAAGCGGTTGCCAAGAGTTCCATCTGCCAGGATTCAGGCAAGGATA  
TGGGCTCACTGAGACTACATCAGCTATTCTGATTACACCCGAGGGGATGATAAACCCGGGCGGGTAAAGTTTGTCCGATA  
TTTTGAAGCGAAGTTGTGGATCTGGATACCGGAAAAACGCTGGGCGTTAATCAAAGAGGCGAACTGTGTGTGAGAGGTCCTATG  
ATTATGTCGGTTATGTAACAATCCGGAAGCGACCAACGCTTATTGACAAGGATGGATGGCTACATTCTGAGACATAGCTT

ACTGGGACGAAGACGAACACTTCTTCATCGTTGACCGCCTGAAGTCTCTGATTAAGTACAAAGGCTATCAGGTGGCTCCCGCTGA  
ATTGGAATCCATCTTGCTCCAACACCCCAACATCTTCGACGACAGGTGTCGAGGTCTCCCGACGATGACGCCGGTGAACCTCCCG  
CCGCGTGTGTTTTGGAGCACGAAAAGACGATGACGGAAGAGATCGTGGATTACGTCGCCAGTCAAGTAACAACCGCGA  
AAAAGTTGCGCGGAGGAGTTGTGTTTGTGGACGAAGTACCGAAAGTCTTACCGGAAAACCTCGACGCAAGAAAAATCAGAGAG  
ATCCTCATAAAGGCCAAGAAGGGCGGAAAGATCGCCGTGAAGCGGCCGACCGGTGACAGATGATAAGATACATTGATGAGTT  
TGGACAAACCACAAGTGAATGCAGTGAAGAAAAATGCTTTATTTGTGAAATTTGTGATGCTATTGCTTTATTTGTAACCATTAAG  
CTGCAATAAACAAGTTAACAACAACAATTGCATTATTTATGTTTCAGGTTACGGGGGAGGTGTTGGGAGGTTTTTAAAGCAAGT  
AAAACCTTACAAATGTGGTAGCCGGCTAATCTTAAGTTAATTTAATTAAGTCGACGATGTAGGTACAGGTCTCGAAGCCGCG  
GTGCGGGTGCCAGGGCGTGCCTTGGGCTCCCCGGCGGCTACTCCACCTCACCCATCTGGTCCATCATGATGAACGGGTCGAGG  
TGCGGTGATTTGATCCCGGCGAACGCGCGCGCACCGGGAAGCCCTCGCCCTCGAAACCGCTGGGCGCGGTGGTACCGGTGAG  
CACGGGACGTGCGACGGCGTGCAGGGGTGCGGATACGCGGGGACGCTCAGCGGGTCTCGACGGTACGGCGGGCATGTCGA  
CAGATCTGACAATGTTAGTGCAGAGACTCGGCTACGCTCGTGGACTTTGAAGTTGACCAACAATGTTTATTCTTACCTTAATAG  
TCCTCTGTGGCAAGGTCAAGATTCTGTTAGAAGCAATGAAGAACCTGGTTGTTCAATAACATTTTGTCTGCTAATATTTCACTAC  
CGCTTGACGTTGGCTGCATTCATGTACCTCATCTATAACGCTTCTTCTGTATCGCTCTGGACGTCATCTTCACTTACGTGATCTGA  
TATTTCACTGTGAGAATCCTCACCAACAAGCTCGTATCGCTTTCGAGAAGAGCAGAGAGGATATGCTCATCGTCTAAAGAACTAC  
CCATTTTATTATATATTAGTACGATATCTATAACAAGAAAATATATATAATAAGTTATCACGTAAGTAGAACATGAAATAACAA  
TATAATTATCGTATGAGTTAAATCTTAAAAGTCACGTAAAAGATAATCATGCGTCATTTTGACTCACGCGGTGCTTATAGTTCAAAA  
TCAGTGACACTTACCGCATTGACAAGCACGCCTCACGGGAGCTCAAAGCGGGGACTGAGATGTCCTAAATGCACAGCGACGGATT  
CGCGCTATTTAGAAAGAGAGCAATATTTCAAGAATGCATGCGTCAATTTTACGCAGACTATCTTTCTAGGGTTAAAAAGATTT  
GCGCTTACTCGACCTAACTTTAAACACGTCATAGAATCTTCGTTTGACAAAAACCACTTTGCGCAAGCTGTGTGACCGCAGC  
GCGCTAAAGAAATGGCAACCAAGTCGCGCGAGCGTCACTCTAGAGGATCCCGGGTACCGAGCTCGAATTCTGTAATCATGTCA  
TAGCTGTTTCTGTGTGAAATTTATCCGCTCACAAATCCACACAACATACGAGCCGGAAGCATAAAGTGTAAGCCTGGGGTGC  
CTAATGAGTGAGCTAACTCACATTAATTGCGTTGCGCTCACTGCCGCTTCCAGTCGGGAAA

**VgR2/anti-dah**

CCTGTGCTGCCAGTGCATTAATGAATCGGCCAACGCGCGGGGAGAGGGCGTTTGCCTATTGGGCGCTTCCGCTTCTCGCTC  
ACTGACTCGCTGCGCTCGGTGTTCCGGTGCAGGAGCGGTATCAGCTCACTCAAAGGCGGTAATACGGTTATCCACAGAATCAG  
GGGATAACGCAGGAAAGAATGTGAGCAAAAGGCCAGCAAAAGGCCAGGAACCGTAAAAAGGCCGCTTGGTGGCGTTTTTC  
CATAGGCTCCGCCCCCTGACGAGCATCAAAAAATCGACGCTCAAGTCAGAGGTGGCGAAACCCGACAGGACTATAAGATACC  
AGGCGTTTTCCCTGGAAGCTCCCTCGTGCCTCTCCTGTTCCGACCTGCCGTTACCGGATACCTGTCGCTTTTCTCCCTCGG  
GAAGCGTGGCGCTTTCTCATAGCTCAGCTGTAGGTATCTCAGTTCCGTTAGGTGCTTCCGCTCAAGCTGGGCTGTGTGCACGA  
ACCCCCGTTAGCCCGCTGCGCTTATCCGGTAACTATCGTCTTGAGTCCAACCCGGTAAGACACGACTTATGCCACTGG  
CAGCAGCCACTGGTAACAGGATTAGCAGAGCGAGGTATGAGGCGGTGCTACAGAGTTCTTGAAGTGGTGGCCTAACTACGGCT  
ACACTAGAAGAACAGTATTTGGTATCTGCGCTCTGCTGAAGCCAGTTACCTTCGAAAAAGAGTTGGTAGCTCTTGATCCGGCAA  
ACAAACCACCGCTGGTAGCGGTGGTTTTTTTGTGCAAGCAGCAGATTACGCGCAGAAAAAAGGATCTCAAGAAGATCCTTTG  
ATCTTTTCTACGGGTCTGACGCTCAGTGGAACGAAAACCTCACGTTAAGGGATTTTGGTCTAGAGATTACAAAAGGATCTTAC  
CTAGATCCTTTAAATTAATAAGGTTTTAAATCAATCTAAAGTATATAGAGTAACTGGTCTGACAGTTACCAATGCTTAAT  
CAGTGAGGCACCTATCTCAGCGATCTGTCTATTTGTTTCCATAGTTGCTGACTCCCGTCTGTAGATAACTACGATACGGGA  
GGGCTTACCATCTGGCCCAAGTGTGCAATGATACCGCGAGACCCAGCTCACCGGCTCCAGATTTATCAGCAATAAACAGCCA  
GCCGGAAGGGCCGAGCGCAGAAGTGGTCTGCAACTTTATCCGCTCCATCCAGTCTATTAATTGTTGCCGGGAAGCTAGAGTAA  
GTAGTTCCGAGTTAATAGTTTGCAGCAACGTTGTTGCCATTGTACAGGCATCGTGGTGTACGCTCGTCTTGGTATGGCTTCAT  
TCAGCTCCGGTCCCAACGATCAAGGCGAGTTACATGATCCCATGTTGTGCAAAAAAGCGGGTATGCTCCTTCCGGTCTCCGAT  
CGTTGTGAGAAGTAAGTTGGCCGAGTGTATCACTCACTGTTATGGCAGCACTGCATAATTTCTTACTGTACATCCCAAGTAA  
GATGCTTTTCTGTGACTGGTGTAGTACTCAACCAAGTCATTCTGAGAATGTGTATGCGGCGACCGAGTTGCTCTTGGCCGCGTCA  
ATACGGGATAATACCGCGCCACATAGCAGAACTTTAAAGTGCTCATCATTTGAAAAACGTTCTTCCGGGGCAAAAACCTCAAGGA  
TCTTACCCTGTTGAGATCCAGTTGATGTAACCCACTCGTGCACCAACTGATCTTACGATCTTTACTTTACCAGCGTTTTCTGG  
GTGAGCAAAAACAGGAAGGCAAAATGCCGCAAAAAGGGAATAAGGGCGACACGGAATGTTGAATACTCATACTTCTCTTTTT  
CAATATTATTGAAGCATTTATCAGGGTTATTGTCTCATGAGCGGATACATATTTGAATGTATTTAGAAAAATAACAATAAGGGGT  
TCCGCGCACATTTCCCGAAAAGTGCCACCTGACGCTAAGAAACCAATTATTATCATGACATTAACCTATAAAAATAGGCGTATCAC  
GAGGCCCTTCTGCTCGCGCTTTCGGTGTGACGGTGAACCTCTGACACATGCAGTCCCGGAGACGGTACAGCTTGTCTG  
TAAGCGGATGCCGGGAGCAGACAAGCCGTCAGGGCGCGTACGCGGGTGTGGCGGGTGTGGGGCTGGCTTAACTATGCGGC  
ATCAGAGCAGATTGACTGAGAGTGACCATATGCGGTGTGAAATACCGCACAGATGCGTAAGGAGAAAAATACCGCATCAGGGC  
CCATTGCCATTAGGCTGCGCAACTGTTGGGAAGGGCGATCGGTGCGGGCCTTCTCGCTATTACGCCAGCTGGCGAAAGGGGG  
ATGTGCTCAAGGCGATTAAGTTGGGTAACGCCAGGGTTTTCCAGTACGACGTTGTAACGACGCGCCAGTGCCAAGCTTTGT  
TTAAAAATAACAACAAATTTGATCCCAAAAATGAAGTGGGGCAAAAATCAAATAATTAATAGTGTCCGTAACCTTGTGGTCTTC  
AAATTTTTGAGAACACAGTTGGACGGCAAACTCCGTGACTATAACACAAGTTGATTTAATAATTTTAGCCAACAGCTGCGGTGCGT  
GTTTTTTGCCGACGCGTCTGTGTACAGTTGATTAACCTGGTGCATTAACCTGTTGAAATAATTTAATTTTTGTTTCTTCTTAACTCT  
GTGATGAAATTTTTAAATAAATTTAAATTTCTTATTGGTAAAAATGCCACGTTTTGCAACTTGTGAGGGTCTAATATGAGGTCA

AACTCAGTAGGAGTTTTATCCAAAAAGAAAACATGATTACGTCTGTACACGAACGCGTATTAACGCAGAGTGCAAAGTATAAGA  
GGGTTAAAAAATATATTTTACGCACCATATACGCATCGGGTTGATATCGTTAATATGGATCAATTTGAACAGTTGATTAACGTGTCT  
CTGCTCAAGTCTTTGATCAAAACGCAAAATCGACGAAAATGTGTGGACAATATCAAGTCGATGAGCGAAAAACTAAAAAGGCTAG  
AATACGACAATCTCACAGACAGCGTTGAGATATACGGTATTCACGACAGCAGGCTGAATAATAAAAAAATTAGAACTATTATTTA  
ACCTAGAAAAGATAATCATATTGTGACGTACGTTAAAGATAATCATGCGTAAAAATTGACGCATGTGTTTTATCGGTCTGTATATCG  
AGGTTTATTTAATTTGAATAGATATTAAGTTTTATTATTTTACACTTACATACTAATAATAAAATCAACAAACAATTTATTTATG  
TTTATTTATTTAAAAAACAACAACTCAAAATTTCTTCTATAAAGTAACAAAACCTTTTAAACATTCTCTTTTACAAAAATAA  
ACTTATTTTGTACTTTAAAAACAGTCATGTTGTATTATAAATAAGTAATTAGCTTAACTTATACATAATAGAAAACAAATTATACTTA  
TTAGTCAGTCAGAAAACACTTTGGCACATATCAATATTATGCTCTCGACAAAATAACTTTTTTGCATTTTTTGCACGATGCATTTGCCT  
TTCGCCTTATTTAGAGGGGCGAGTAAGTACAGTAAGTACGTTTTTTTCTTACTGGCTCTTCAGTACTGTCATCTGATGTACCAGGCA  
CTTCATTTGGCAAAATATTAGAGATATTATCGCGCAAAATCTCTTCAAAGTAGGAGCTTCTAAACGCTTACGCATAAACGATGAC  
GTCAGGCTCATGTAAGGTTTCTCATAAATTTTTGCGACTTTGAACCTTTTCTCCCTTGTACTGACATTATGGCTGTATATAATAA  
AAGAATTTATGCGAGCAATGTTTATCATTCCGTACAATAATGCCATAGGCCACTATTCTGCTTCTACTGCAGGTCATCACAGAAC  
ACATTTGGTCTAGCGTGTCCACTCCGCTTTAGTTTGATTATAATACATAACCATTTGCGGTTTACCGTACTTTCTGTTGATAGAAG  
CATCCTCATCACAGATGATAATAAGTATACCATCTTAGCTGGCTTCCGTTTTATGAGACGAGAGTAAGGGGTCGGTCAAAAACA  
AACATCGATGTTCCACTGGCCTGGAGCGACTGTTTTTCACTTCCGGTATCTCGCGTTTGTGATCGCACGGTTCCCAACATG  
GTTAATTCGAGCTCGCCCGGGGATCTAATCAATTAGAGACTAATCAATTAGAGCTAATCAATTAGGATCCAAGCTTATCGATTT  
CGAACCTCGACCGCCGGAGTATAAATAGAGGCGCTTCGTCTACGGAGCGACAATCAATCAACAAGCAAAGTGAACACGTCG  
CTAAGCGAAAGCTAAGCAAATAACAAGCGCAGCTGAACAAGCTAAACAATCGGGTACCGCTAGAGTCGACGGTACCGCGGGC  
CCGGATCCACCGTCCGACCATGGTGCCTCTCCAAGAAGCTCATCAAGGAGTTCATGCGCTTCAAGGTCGCGATGGAGGGC  
ACCGTGAACGGCCACGAGTTCGAGATCGAGGGCGAGGGCGAGGGCCGCCCCCTACGAGGGCCACAACACCGTGAAGCTGAAGGT  
GACCAAGGGCGGGCCCCCTGCCCTTCCGCTGGGACATCCTGTCCCCCAGTTCAGTACGCTCCAAGGTGTACGTGAAGCACCCC  
GCCGACATCCCCGACTACAAGAAGCTGTCTTCCCCGAGGGCTTCAAGTGGGAGCGCGTGTGAACCTCGAGGACGGCGGGCTG  
GTGACCGTGACCCAGGACTCCTCCCTGCAGGACGGCTGCTTCACTACAAGGTGAAGTTCATCGGCGTGAACCTCCCTCCGACG  
GCCCGTAATGCAGAAGAAGACCATGGGCTGGGAGGCTCCACCGAGCGCTGTACCCCCGACGGCGTGTGAAGGGCGAG  
ATCCACAAGGCCCTGAAGCTGAAGGACGGCGGCCACTACCTGGTGGAGTTCAGTCCATCTACATGGCCAAGAAGCCGTGCAG  
CTGCCCGGCTACTACTACGTGGACTCCAAGCTGGACATCACCTCCACAACGAGGACTACACCATCGTGGAGCAGTACGAGCGCA  
CCGAGGGCCGCCACCCTGTTCTGTAGCGGCCGCGACTTAGATCATAATCAGCCATACCACATTTGTAGAGGTTTTACTTGCT  
TTAAAAACCTCCACACCTCCCCCTGAACCTGAAACATAAAATGAATGCAATTTGTTGTTGTTAACTGTTTTATTGCAGCTTATAAT  
GGTTACAAATAAAGCAATAGCATCAAAATTTCAAAATAAAGCATTTTTTCACTGCATTCTAGTTGTGGTTTTGCCAACTCATC  
AATGTATCTTAAAGCTTATCGATACGCGTACGGCGCCCTGTGACAGCTTGACGTATTGACATTTGTTTTGTTACAGTTCTGATAC  
TTGCCCAATAACAATCACCGCACAGGCTGTAAGAGCGCTTTTAAAGAGCGTTTAAATCAGTTTGTAGTTGCTATGTTCTTACTAC  
AAGGCTTAATAAAGCTGTGCTGCGGTTTTGTGAAGTTTTTGAAGCTGCAAGTAAAGCAACCGACAAGCCAACAAAAATG  
GAGGATTTTTACAGTAACATGTTGTTCTGGCTTACGACATTCGTATCATGCCAGCGATCTAATGGGCTACTGATTTACTGATA  
CCACGTAGCTGGATCTATCTCACTATGGGGGAACGCTCTGGATGGGATTGATACCAATCTGGCGAGAGGAGGCCAGCTATC  
GCCGTGGCCACCGAATTAACAAAAATTATGTATTAATTTTTTAAAGTGCATTTTCAAACCTAGCGCATGATTTTTGTATCGATTT  
GGTTTGATTTACGGACAAACCTGATTGAGGACGATCGGCTAATTTCTCGGTTCTTATTGAGGACGCTCATTGGATGTAGTTTGT  
ATGGTTTAAATTCGTGATCCAGTCACAGTATCTTACCACGAGCTTTTACAAGGCCTCAAGCTACTATGAGGCCGATTGGCAAAGG  
TTGATGGTTCGAGGACGATAGCGGCGCGTGTTCACACAGCAGGACTAGATATCAATGCCGTCTGGAACGTCTCCCTGACTATC  
TACTTAGAAATCCAGGCACAAATCAAGTCAAGTTGTAGAGCCAAGTTTTGGTAGATGGAGATGCTCTTACGAATAATCGTTGCTTCA  
TAAATGGTGAGTATAAGGGCTCCGCGTCCAGGAGCCATCGTAGTCCGACCCTCATTTCTCGAGGTGCCAGTTAGGAAGCCCA  
CTGTAATGGTATCTCTACCTGTACCTGTCCGCCCACCAGATATCGGCCAGAGTACGCAGTTCAAGCGAATGAGCGTTGACTCGAG  
GACTGGACTGAACCCGTTATACCGTTCCCGGTGGATTGTAGTTGAGCATTTTTCATGTTCTTGTGGCTTGCAGACAGGTCGAT  
GAAGTGACATGCAGGTCTGAACGGCTGATTCCGAGTTGGTCTTCGAGATGTGAAACCATGATGTTTTAGTCTCAGGAAAAGCGAC  
CTTGTGAGGTTACTCCCGTCCCTAGCATCGAACCGCGTAGCGAGGAAACTGATATTCGTGGACTGTATGAAATTTGCAGATG  
ATCGTCGGGGAATTTTATGTTGGAGGTTCTTTGTGAATGCAGGCCCTTGTGAGCTCGGAGTACCCTACCTTCTGCTCGCGGACT  
ATTTATCCCATCAAAGGACAGGAAGGACACTAGGACATGTTTTCTGGTCTTAAACGCCAAACACCTCTAACCCAAGAACTAGGCG  
TATCGTCCGGACCATTTCTTCTTATTGATACGTTTATAGTTTCAATGTGAAGTAAGGTATATACAGGGAATCCCGTAAGCCAGTAAG  
GTGATCAATACTGAAACTGAAAAATCCAAAGCCTCAGAAGCAATATTTTACGCCCTATCTGCAGTGTGTTGATTTGGTATAAAA  
TAAAAACCTCTTCTGTTTTAGATGGACATGCTGGGCATGGCATTATTAAGGACTTGTACTACAAACACATTTGTTCTTTGTAATGA  
AATTTTGAAGAAAAAAGGTAAGTAATATACTCAAAGAATGCATGACGAAAGAAAGATTATCCTTCTATCCTAAGTATCCTAA  
GTGGATAACCGATCAATCCCAATGTAGTGGCCATTTTGAACCCGAAACCTCGCGACGCGTCTAGTGCTATAATTCCGGACCACA  
GCAAACGAGCGATTGGCTTAGTTCTATTCCAGCAGCCTTTTCTTCCGTCGTCTTGTTCGTGACGCTTGGCGACTTTTGTGTTGA  
TTTTGTTCTATTGACTGTTCTATTGTAAGTGAATGTAGAAGAATGTGCAGTGCATCGTAAGCTAGCATTATTGCCCTCATCAC  
ATCCGCTAGCTGGCTGAAACTGAGCTAGACAAAGGATCAATGCRGACGACACGCGTTAGGGTATACCGATCGTGGCTT  
ATTTCTGATGAGTGTAGTACTACAGCAGCGCGCTGTTTTTGCACAAAACAAATGGAGGCTAATGTCTTGTATTGATCCAC  
TTGCCGAGGTAAGTCTAGGTTAGAAGTGACCGAAATCGGACCGAGCTTTGACCGTTTTGATCGTCCATTGTTGTGATA  
CAGGATTGAATATCTACTCTGCGAGCTTTAAAGGTAAGAAGATCGTTGATAGGCGCTAATGGGATTTGTGGGAGCAAGAGTG

TTGATCTGAAGTGC GAACCGTATGCTGGATGGAAGTATTTGATCGCCATGTCTAAGGAGTCAATATGAACAATGATATGGAAGC  
AACTACGTCTTCAACATTTTCATTGTAATAATTGTTGAAACGCAGTTGCTTCCCTATTGGGGTTCATAATTTCTACTGAGTCTTTGTGC  
CTATTGGATTACGCAAGAATGGCGATTGCTTTCCACCTCAGAGTCAATACACGATATGGAATACGGTTTGATTTACTCTCGAAG  
GCGAAAGGCAATTACATTTGTAACACAGTAACCTGAAACAAGTGATACCTATTGTTATAATACGTGACGTAAGAAGTGAAGAA  
TGCCAGTTTTGTTCAACAACGATACAACGTAATCGACATTTTGTAAATATGTGATATGAATATTAAGTGATTTTCAGTTATGTAAT  
TATAATTGTGATCCAAATACGAGCATTATGAGTGGTTTCTCTATATGTTACAATGGATTAAGTTGTACCACTGCGTTCTAAGTCCAA  
TCGATTACATGATTTTTGAACATAACTGTAATCGAGTGGACGGAAGAACCGCTGTTGGCAATATAGTCATCGAGTTAAACCCATAA  
ATTTGTAAGAAATTTAAATGCATAGCTTTCTATGAACGTTACATTAATACATTAATTTTTTTTCATTCTAGATGGAAGACGCCAAA  
AACATAAAGAAAGGCCCGCGCCATTCTATCCGCTGGAAGATGGAACCGCTGGAGAGCAACTGCATAAGGCTATGAAGAGATAC  
GCCCTGGTTCTGGAACAATTGCTTTACAGATGCACATATCGAGGTGGACATCACTTACGCTGAGTACTTCAAAATGTCGGTTCG  
GTTGGCAGAAGCTATGAAACGATATGGGCTGAATACAATCACAGAATCGTCGATGCAGTGAAGTCTCTTCAATCTTTATGC  
CGGTGTTGGGCGCTTATTTATCGGAGTTGCAGTTGCGCCCGCAACGACATTTATAATGAACGTGAATTGCTCAACAGTATGGG  
CATTTCCGACGCTACCGTGGTGTTCGTTTCAAAAAGGGGTTGCAAAAAATTTGAACTGCAAAAAAAGCTCCCAATCATCCAAA  
AAATTATTATCATGGATTCTAAAACGGATTACCAGGGATTTTCAGTCGATGTACACGTTTCGTCACATCTCATCTACCTCCCGTTTTA  
ATGAATACGATTTTGTGCCAGAGTCTTCGATAGGGACAAGACAATTTGCACTGATCATGAACCTCTGGATCTACTGGTCTGCCT  
AAAGGTGTCGCTCTGCCTCATAGAATGCTGCGTGAGATTCTCGCATGCCAGAGATCCTATTTTTGGCAATCAAATCATTCCGGA  
TACTGCGATTTTAAAGTGTGTTCCATTCCATCACGGTTTTGGAATGTTTACTACACTCGGATATTTGATATGTGGATTTTCAGTCTGC  
TTAATGTATAGATTTGAAGAAGAGCTGTTTCTGAGGAGCCTTCAGGATTACAAGATTCAAAGTGCCTGCTGGTGCACCCCTATT  
CTCCTTCTCGCAAAAAGCACTCTGATTGACAAAACGATTTATCTAATTTACACGAAATTTGCTTCTGGTGGCGTCCCTCTCTAAG  
GAAGTCGGGGAACGGGTTGCAAGAGGTTCCATCTGCCAGGTACAGGCAAGGATATGGGCTCACTGAGACTACATCAGCTATT  
CTGATTACACCCGAGGGGATGATAAACCCGGCGCGGTGCGTAAAGTTGTTCCATTTTTGAAGCGAAGGTTGGATCTGGATA  
CCGGGAAAACGCTGGGCGTTAATCAAAGAGGCGAACTGTGTGTGAGAGGTCCTATGATTATGTCGGTATGTAACAATCCGG  
AAGCGACCAACGCCTTGATTGACAAGGATGGATGGCTACATTCTGGAGACATAGCTTACTGGGACGAAGACGAACACTTCTTCAT  
CGTTGACCGCTGAAGTCTCTGATTAAGTACAAAGGCTATCAGGTGGCTCCCGCTGAATTGGAATCCATCTTGTCCAACACCCCA  
ACATCTTCGACGCAGGTGTCGACGCTTCCCGACGATGACGCCGTTGAACTCCCGCCGCGTGTGTTTTGGAGCACGGAAA  
GACGATGACGGAAGAGATCGTGGATTACGTCGCCAGTCAAGTAAACCCGCAAAAAGTTGCGCGGAGGAGTTGTGTTTTGT  
GGACGAAGTACGAAAGGCTTACCGGAAAACCTGACGCAAGAAAAATCAGAGAGATCCTCATAAAGGCCAAGAAGGGCGGAA  
AGATCGCCGTGAAGCGGCCGACCCGGTCAGACATGATAAGATACATTGATGAGTTTGGACAAACCACAACACTAGAATGCAGTGA  
AAAAATGCTTTATTTGTGAATTTGTGATGCTATTGCTTTATTTGTAACCATTATAAGCTGCAATAAACAAGTTAAACAACAAT  
TGCAATCATTTATGTTTCAGGTTTCAGGGGAGGTGTGGGAGGTTTTTAAAGCAAGTAAAACCTCTACAAATGTGGTAGCCGGCT  
TAATTTAAGTTAATTTAATTAAGTCGACGATGTAGGTACGGTCTCGAAGCCGCGGTGCGGGTGCCAGGGGCTGCCCTTGGG  
CTCCCGGGGCACTCCACCTCACCCATCTGGTCCATCATGATGAACGGGTCGAGGTGGCGGTAGTTGATCCCGGCAACGCG  
CGGCGACCCGGGAAGCCCTCGCCCTCGAAACCGCTGGGCGCGGTGTTACGCTGAGCACGGGACGTGCGACGGCGTGGCGGG  
TGCGGATACGCGGGGACGCTCAGCGGTTCTCGACGGTCACGGCGGGCATGTGACAGATCTGACAATGTTCAAGTGCAGAGAC  
TCGGCTACGCCTCGTGACTTTGAAGTTGACCAACAATGTTTATTCTTACCTAATAGTCTCTGTGGCAAGGTCAAGATTCTGTT  
AGAAGCCAATGAAGAACCTGTTGTTCAATAACATTTTGTTCGTTAATATTTCACTACCGCTTGACGTTGGCTGCACTTCATGTAC  
CTCATCTATAAAGCCTTCTTGTATCGCTCTGGACGTCATCTTCACTACGTCGATCTGATTTCACTGTCAGAATCCTCACCAACA  
AGCTCGTCATCGCTTTCGAGAAGAGCAGAGAGGATATGCTCATCGTCTAAAGAAGTACCCATTTTATTATATATTAGTCACGATATC  
TATAACAAGAAAATATATATAATAAGTTATCACGTAAGTAGAATGAAATAACAATATAATTATCGTATGAGTTAAATCTTAA  
AAGTCACGTAAGGATAATCATGCGTCATTTGACTCACGCGGTGTTATAGTTCAAATCAGTGACACTTACCGCATTGACAAGC  
ACGCCTCACGGGAGCTCCAAGCGGCGACTGAGATGTCCTAAATGCACAGCGACGGATTTCGCGCTATTTAGAAAGAGAGCAAT  
ATTTCAAGAATGCATGCGTCAATTTACGCAGACTATCTTCTAGGGTTAAAAAGATTTGCGCTTACTCGACCTAAACTTTAAAC  
ACGTCATAGAATCTTCGTTGACAAAAACCATTTGGCCAAGTGTGTGACGCGACGCGCTAAAGAATGGCAAACCAAGTC  
CGCGAGCGTCACTAGAGGATCCCGGGTACCGAGCTCGAATTCGTAATCATGTCATAGCTGTTTCTGTGTGAAATTTGTTAT  
CCGCTCACAAATCCACACAACATACGAGCCGGAAGCATAAAGTGTAAAGCCTGGGGTGCCTAATGAGTGAGCTAACTCACATTA  
TTGCGTTGCGCTACTGCCGCTTCCAGTCGGGAAA
