# Supplementary material for: Maternal Germline-Specific Genes in the Asian Malaria Mosquito Anopheles stephensi: Characterization and Application for Disease Control
Source: PubMed Central journal article supplement (PMC4321024; doi:10.1534/g3.114.015578), 2014-12-05
Supplement: supp_g3.114.015578_FileS5.pdf [file supp_g3.114.015578_FileS5.pdf]

File S5

Primers and Probes used for RT-PCR, qRT-PCR, and ddPCR

**RT-PCR**

***chorion peroxidase (AAEL004386)***

Forward

AAGGAGAAACCAGAAGCCATGT

Reverse

CGTGCTTCGTTGTAACCAC

***myd88***

Forward

TGGGACATCCTGGACGATAC

Reverse

TCCGATTCGTTCACTTTCTTG

***cortex***

Forward

GACCTCGATAGCGTTCAATCC

Reverse

AAGCGTCGTCACGATACAATC

***nanos***

Forward

CGATAGTGCCATCATGACGTCGG

Reverse

CGCGCCAATTGTCTTGTACCAG

**Droplet Digital PCR**

***myd88***

Forward

TGGGACATCCTGGACGATAC

Reverse

TCCGATTCGTTCACTTTCTTG

Probe

5'FAM-TGCTCAGCGTCTTGTCAAACA-3'BHQ-1

***dah***

Forward

TGTTTATCCTGCTGACAATCAAC

Reverse

CTGTCGATCAGGTTTCAGCTG

Probe

5'FAM-CAGAAAGCGCTCTACACATCGTACATT-3'BHQ-1

***rpS4***

Forward

TCTAAAGTACGCACTGACCAACAG

Reverse

CGTAGATCAGGCGGAAGTATTC

Probe

5'HEX-CCGGTTTCATGGATGTGATCAAC-3'BHQ-1

***proteasome subunit beta type II***

Forward

CTTTAATGGGAATTCGCGG

Reverse

GGTGGCCATCATCAGGTTAT  
Probe  
5'HEX-CATGGTGCTGAAGGACGACG-3'BHQ-1

**Primers used for RT-qPCR assay in S7**

ASTEI01053\_F  
CTTACGCTGCAGATCCTG  
ASTEI01053\_R  
CTCTGGTGAGCAAGAAAGAC  
ASTEI09200\_F  
ACAAATATTGCAGACGATCG  
ASTEI09200\_R  
TTCACCTTCGGTCGAAAG  
ASTEI00456\_F  
GAGCGTGACGACAGCTATG  
ASTEI00456\_R  
AGACACACGATCCAGCAG  
ASTEI07783\_F  
GTATACATTCCGCTGTGACG  
ASTEI07783\_R  
GCTGGAAGCTATTATGCAAG  
ASTEI01055\_F  
GCCTTCAATGTTTCATACACC  
ASTEI01055\_R  
CGTTATGAGATCTGGCACTG  
RPS4\_F  
GTAACCGTCTAAAGTACGCACTG  
RPS4\_R  
GGTCTTGTGGATGTTGATCAC
